# Supplementary material
Source: publisher site journal article supplement (https://www.dovepress.com/get_supplementary_file.php?f=264898.xlsx)
Supplement: Supplementary file 1 [file get_supplementary_file.php]

## Sheet: List of table
List of tables
Table S1 Active Components in AMC
Table S2 Ingredients in AMC and corresponding targets
Table S3 Related gene in renal fibrosis
Table S4 All potential targets of AMC against renal fibrosis
Table S5 Gene Ontology (GO) Biological Process analysis of AMC treating renal fibrosis (p < 0.01)
Table S6 Gene Ontology (GO) Cellular Component analysis of AMC treating renal fibrosis (p < 0.01)
Table S7 Gene Ontology (GO) Molecular Function analysis of AMC treating renal fibrosis (p < 0.01)
Table S8 Kyoto Encyclopedia of Genes and Genomes (KEGG) Pathway analysis (p < 0.05)
Table S9 The number of targets, reference, network based efficacy (NE) and contribution indexes (CI) of potential active components in AMC

## Sheet: Table S1
Table S1 Active Components in AMC
No.	Molecule Name	pubchen-CID	CAS	Formula	MW(g/mol)	OB(%)	DL	Number of article recorded in PubMed
AMC1	caffeic acid	689043	331-39-5	C9H8O4	180.16	54.97	0.19	5
AMC2	quercetin	5280343	117-39-5	C15H10O7	302.23	46.43	0.28	19
AMC3	stigmasterol	5280794	83-48-7	C29H48O	412.7	43.83	0.76	0
AMC4	α-spinasterol	5281331	/	C29H48O	412.7	42.98	0.76	0
AMC5	9,12-octadecadienoic acid	5280450	60-33-3	C18H32O2	280.4	41.9	0.14	13
AMC6	β-sitosterol	222284	83-46-5	C29H50O	414.7	36.91	0.75	0
AMC7	myricetin	5281672	529-44-2	C15H10O8	318.23	13.75	0.31	3
AMC8	quercetin-7-O-β-D-glucoside	5282160	491-50-9	C21H20O12	464.4	2.85	0.79	0
AMC9	quercetin-3-O-robinobioside	44259100	/	C27H30O16	610.5	/	/	0
AMC10	hyperoside	5281643	482-36-0	C21H20O12	464.4	6.94	0.77	2
AMC11	isoquercitrin	5280804	482-35-9	C21H20O12	464.4	1.86	0.77	2
AMC12	gossypetin-8-O-β-D-glucuronide	133613102	/	C21H18O14	494.4	/	/	1
AMC13	quercetin- 3′-O-β-D-glucoside	5748594	19254-30-9	C21H20O12	464.4	/	/	1
AMC14	rutin	5280805	153-18-4	C27H30O16	610.5	3.2	0.68	4

## Sheet: Table S2
Table S2 Ingredients in AMC and corresponding targets
Molecule Name	Pubchem CID	Gene Symbol		Gene Symbol (non-repetitive)
caffeic acid	689043	CA2		CA2
		ALOX5		ALOX5
		CA7		CA7
		CA1		CA1
		CA6		CA6
		MMP9		MMP9
		CA12		CA12
		MMP1		MMP1
		MMP2		MMP2
		PTPN1		PTPN1
		CA14		CA14
		CA9		CA9
		CA5B		CA5B
		CA5A		CA5A
		CA3		CA3
		AKR1B1		AKR1B1
		ESR2		ESR2
		CA4		CA4
		AKR1B10		AKR1B10
		HCAR2		HCAR2
		MIF		MIF
		CA13		CA13
		NQO2		NQO2
		TLR4		TLR4
		ESR1		ESR1
		SLC6A2		SLC6A2
		MAPK1		MAPK1
		AKR1C4		AKR1C4
		TPMT		TPMT
		NGFR		NGFR
		SYK		SYK
		FYN		FYN
		LCK		LCK
		APP		APP
		KDM4E		KDM4E
		KDM4A		KDM4A
		EGFR		EGFR
		CTBP2		CTBP2
		MAOB		MAOB
		PTGS1		PTGS1
		PIK3CB		PIK3CB
		CYP1A2		CYP1A2
		CYP2C9		CYP2C9
		CYP3A4		CYP3A4
		CYP2C19		CYP2C19
		PIK3CA		PIK3CA
		KDM3A		KDM3A
		KDM6B		KDM6B
		FTO		FTO
		KDM4C		KDM4C
		ELANE		ELANE
		FGF2		FGF2
		VEGFA		VEGFA
		MMP8		MMP8
		F3		F3
		HSD11B1		HSD11B1
		NFE2L2		NFE2L2
		STAT3		STAT3
quercetin	5280343	NOX4		NOX4
		AVPR2		AVPR2
		AKR1B1		XDH
		XDH		MAOA
		MAOA		IGF1R
		IGF1R		FLT3
		FLT3		CYP19A1
		CYP19A1		F2
		EGFR		PIM1
		F2		AURKB
		CA2		DRD4
		PIM1		ADORA1
		ALOX5		GLO1
		AURKB		MPO
		DRD4		PIK3R1
		ADORA1		ADORA2A
		CA7		DAPK1
		GLO1		PYGL
		MPO		GSK3B
		PIK3R1		SRC
		ADORA2A		PTK2
		DAPK1		HSD17B2
		PYGL		KDR
		CA1		MMP13
		GSK3B		MMP3
		SRC		ALOX15
		PTK2		ABCC1
		HSD17B2		PLK1
		KDR		CDK1
		MMP13		PKN1
		MMP3		CSNK2A1
		CA3		ALOX12
		ALOX15		MET
		ABCC1		NEK2
		PLK1		CXCR1
		CA6		CAMK2B
		CDK1		ALK
		MMP9		AKT1
		CA12		ABCB1
		MMP2		NEK6
		PKN1		PLA2G1B
		CA14		BACE1
		CA9		CYP1B1
		CSNK2A1		AXL
		ALOX12		ABCG2
		MET		NUAK1
		CA4		AKR1C2
		NEK2		AKR1C1
		CXCR1		AKR1C3
		CAMK2B		AKR1A1
		ALK		GPR35
		AKT1		MAPT
		ABCB1		TOP2A
		NEK6		INSR
		PLA2G1B		ACHE
		CA5A		ACE
		BACE1		MYLK
		CYP1B1		PIK3CG
		AXL		APEX1
		ABCG2		CDK5R1 CDK5
		NUAK1		CCNB3 CDK1 CCNB1 CCNB2
		AKR1C2		ARG1
		AKR1C1		PTPRS
		AKR1C3		MPG
		AKR1C4		SLC22A12
		CA13		CDK6
		AKR1A1		CDK2
		GPR35		TYR
		SYK		HSD17B1
		MAPT		AHR
		KDM4E		ESRRA
		TOP2A		PARP1
		INSR		TTR
		ACHE		MMP12
		ACE		CD38
		MYLK		TNKS2
		PIK3CG		TNKS
		APEX1		TOP1
		CDK5R1 CDK5		TERT
		CCNB3 CDK1 CCNB1 CCNB2		AR
		ARG1		NPC1L1
		PTPRS		HMGCR
		ESR2		CYP51A1
		MPG		NR1H3
		SLC22A12		CYP17A1
		CDK6		RORC
		CDK2		SHBG
		TYR		SREBF2
		HSD17B1		BCHE
		AHR		RORA
		ESRRA		SERPINA6
		APP		SLC6A4
		PARP1		CHRM2
		TTR		G6PD
		MMP12		VDR
		CD38		NR1H2
		AKR1B10		PTGER1
		TNKS2		PTGER2
		TNKS		CDC25A
		TOP1		GLRA1
		TERT		CES2
stigmasterol	5280794	AR		PTGES
		NPC1L1		PPARA
		HMGCR		PPARD
		CYP51A1		SQLE
		CYP19A1		DHCR7
		NR1H3		NR1I3
		CYP17A1		PTPN6
		RORC		NR3C1
		ESR1		CDC25B
		ESR2		NOS2
		SHBG		HSD11B2
		SREBF2		TBXAS1
		ACHE		PPARG
		CYP2C19		UGT2B7
		PTPN1		POLB
		SLC6A2		PREP
		BCHE		ATP12A
		RORA		FNTA FNTB
		SERPINA6		FABP4
		SLC6A4		FABP3
		CHRM2		FABP5
		G6PD		FABP1
		VDR		CNR1
		NR1H2		ADORA3
		HSD11B1		MAPK3
		PTGER1		PTPN11
		PTGER2		PDE4D
		CDC25A		PTPRF
		GLRA1		ACP1
		CES2		SCD
		PTGES		PTPN2
		PPARA		FFAR1
		PPARD		FAAH
		SQLE		LTB4R
		DHCR7		SRD5A2
		TERT		PTGS2
		NR1I3		PGR
		PTPN6		RXRB
		NR3C1		PTGIR
		CDC25B		PTGDR2
		NOS2		PTGER4
		ACE		TRPV1
		HSD11B2		CD81
		TBXAS1		PRKCH
		PPARG		CYP26B1
		UGT2B7		CYP26A1
		POLB		SLC16A1
α-spinasterol	5281331	AR		NR3C2
		CHRM2		IL6
		ACHE		GLUL
		CYP2C19		HTR2B
		CYP19A1		ADRA2B
		SLC6A2		MAPK14
		PTPN1		PLA2G4A
		ESR1		EDNRA
		SLC6A4		FFAR4
		HMGCR		MDM2
		CYP51A1		TRPM8
		SREBF2		PSEN2 PSENEN NCSTN APH1A PSEN1 APH1B
		NPC1L1		CMA1
		CYP17A1		CTSG
		BCHE		GRM2
		SHBG		HNF4A
		RORC		ENPP2
		ESR2		GPBAR1
		NR1I3		OXER1
		NR1H3		PDE4A
		PTGES		RBP4
		SQLE		IMPDH2
		SERPINA6		PTGDR
		CDC25A		METAP1
		CES2		PTGES2
		PTPN6		PRKAG1 PRKAB1 PRKAA2
		PREP		PDE4B
		VDR		ITGAL ICAM1 ITGB2
		POLB		FDFT1
		GLRA1		SIGMAR1
		ATP12A		ST6GAL1
		FNTA FNTB		TNF
		CDC25B		IL2
		FABP4		ADRA2C
		PPARG		NMUR2
		PPARA		ADRA2A
		FABP3		RPS6KA3
		FABP5		ALDH2
		PPARD		MMP7
		FABP1		PRKCA
		RORA		SLC29A1
		CNR1		PDE5A
		HSD11B1
		ADORA3
		MAPK3
		PTPN11
		AKR1B10
		DHCR7
		PDE4D
		PTPRF
		UGT2B7
		PLA2G1B
		ACP1
		SCD
		MET
		G6PD
		PTPN2
		HSD11B2
		NR3C1
		TOP2A
9,12-octadecadienoic acid	5280450	PPARG
		PPARA
		PPARD
		FFAR1
		FABP4
		FABP3
		PTGS1
		SCD
		FABP5
		FAAH
		TERT
		FABP1
		CNR1
		PTPN1
		PTPN2
		ALOX5
		POLB
		PTGES
		ESR2
		LTB4R
		PTPN6
		HMGCR
		CDC25A
		HSD11B1
		PTGER2
		TOP1
		PDE4D
		CDC25B
		SRD5A2
		RORC
		PTGS2
		ALOX12
		SLC22A12
		NOS2
		PGR
		PTGER1
		RXRB
		CYP19A1
		PTGIR
		PLA2G1B
		PTGDR2
		HSD11B2
		PTGER4
		NR3C1
		ADORA3
		TRPV1
		CD81
		PRKCH
		ESR1
		FNTA FNTB
		SERPINA6
		SHBG
		G6PD
		CYP51A1
		NR1H3
		PTPRF
		AR
		CYP26B1
		CYP26A1
		SLC16A1
		PTPN11
		ACP1
		NPC1L1
		CYP17A1
		NR3C2
		PREP
		IL6
		GLUL
		HTR2B
		ADRA2B
		MAPK14
		MAPK1
		PLA2G4A
		EDNRA
		FFAR4
		MDM2
		MAPK3
		CES2
		TRPM8
		PSEN2 PSENEN NCSTN APH1A PSEN1 APH1B
		AKR1B10
		CMA1
		CTSG
		GRM2
		HNF4A
		ENPP2
		GPBAR1
		OXER1
		PDE4A
		BCHE
		RBP4
		IMPDH2
		PTGDR
		METAP1
		MMP2
		TOP2A
		PTGES2
		PRKAG1 PRKAB1 PRKAA2
		PDE4B
		ITGAL ICAM1 ITGB2
β-sitosterol	222284	AR
		HMGCR
		CYP51A1
		NPC1L1
		NR1H3
		CYP19A1
		CYP17A1
		RORC
		ESR1
		ESR2
		SREBF2
		SHBG
		SLC6A2
		CYP2C19
		RORA
		PTPN1
		BCHE
		SERPINA6
		SLC6A4
		CHRM2
		VDR
		ACHE
		G6PD
		NR1H2
		GLRA1
		CES2
		PTGER1
		PTGER2
		HSD11B1
		PTGES
		CDC25A
		PPARA
		PPARD
		DHCR7
		SQLE
		PTPN6
		NR1I3
		FDFT1
		SIGMAR1
		NOS2
		NR3C1
		PPARG
		CDC25B
		MET
		UGT2B7
		HSD11B2
		POLB
myricetin	5281672	MAPT
		KDM4E
		GPR35
		TOP2A
		XDH
		FLT3
		INSR
		ACHE
		GLO1
		MYLK
		SYK
		ABCC1
		PIK3CG
		BACE1
		APEX1
		NOX4
		AVPR2
		AKR1B1
		MAOA
		VEGFA
		IGF1R
		CYP19A1
		EGFR
		F2
		CA2
		PIM1
		ALOX5
		AURKB
		DRD4
		ADORA1
		CA7
		MPO
		PIK3R1
		ADORA2A
		DAPK1
		PYGL
		CA1
		GSK3B
		SRC
		PTK2
		HSD17B2
		KDR
		MMP13
		MMP3
		CA3
		ALOX15
		PLK1
		CA6
		CDK1
		MMP9
		CA12
		MMP2
		PKN1
		CA14
		CA9
		CSNK2A1
		ALOX12
		MET
		CA4
		NEK2
		CXCR1
		CAMK2B
		ALK
		AKT1
		ABCB1
		NEK6
		PLA2G1B
		CA5A
		CYP1B1
		AXL
		ABCG2
		NUAK1
		AKR1C2
		AKR1C1
		AKR1C3
		AKR1C4
		CA13
		AKR1A1
		PTPRS
		CDK5R1 CDK5
		CCNB3 CDK1 CCNB1 CCNB2
		ARG1
		CDK6
		CDK2
		ESR2
		MPG
		SLC22A12
		TYR
		HSD17B1
		AHR
		ESRRA
		BCHE
		ADORA3
		ST6GAL1
		APP
		PARP1
		TTR
		MMP12
		CD38
		AKR1B10
		TNKS2
quercetin-7-O-β-D-glucopyranoside	5282160	TNF
		IL2
		XDH
		AKR1B1
		ADORA1
		CA2
		CA12
		NOX4
		ADRA2C
		NMUR2
		ADRA2A
		ACHE
		RPS6KA3
		NQO2
		CA4
		CD38
		CA7
		ALOX5
		PTGS2
		ALDH2
		MMP1
		MMP7
		MMP8
		MMP13
		PRKCA
		CYP1B1
		SLC29A1
		PDE5A
		CA1
		CA9
quercetin-3-O-robinobioside	44259100	ADRA2C
		ACHE
		AKR1B1
		CA7
		CA12
		CA4
		NOX4
		CA2
		RPS6KA3
		NQO2
		XDH
		CD38
		PTGS2
		PDE5A
		TNF
		IL2
		ADORA1
		ALOX5
		TERT
		NOX4
		ADRA2C
hyperoside	5281643	AKR1B1
		CA2
		CA7
		CA12
		CA4
		ACHE
		NQO2
		RPS6KA3
		NMUR2
		ADRA2A
		PTGS2
		CD38
		PDE5A
		TNF
		IL2
		ADORA1
		XDH
		ALOX5
		SLC29A1
		TERT
		NOX4
		ADRA2C
isoquercitrin	5280804	AKR1B1
		CA2
		CA7
		CA12
		CA4
		ACHE
		NQO2
		RPS6KA3
		NMUR2
		ADRA2A
		PTGS2
		CD38
		PDE5A
		TNF
		IL2
		ADORA1
		XDH
		ALOX5
		SLC29A1
		TERT
		PTGS2
		NOX4
gossypetin-8-O-β-D-glucuropyranoside	133613102	ADRA2C
		CA2
		CA7
		CA12
		CA4
		RPS6KA3
		XDH
		AKR1B1
		NMUR2
		ADRA2A
		ACHE
		NQO2
		CD38
		TNF
		IL2
		ADORA1
		PDE5A
		ALOX5
		AKR1B1
		NOX4
quercetin- 3′-O-β-D-glucoside	5748594	ADRA2C
		CA2
		CA7
		CA12
		CA4
		XDH
		ACHE
		TNF
		IL2
		ADORA1
		NQO2
		NMUR2
		ADRA2A
		RPS6KA3
		CD38
		PTGS2
		ALOX5
		PDE5A
		CYP1B1
		SLC29A1
		ALDH2
		NMUR2
		ADRA2A
rutin	5280805	ADRA2C
		ACHE
		AKR1B1
		CA7
		CA12
		CA4
		NOX4
		CA2
		RPS6KA3
		NQO2
		XDH
		CD38
		PTGS2
		PDE5A
		TNF
		IL2
		ADORA1
		ALOX5
		TERT

## Sheet: Table S3
Table S3 Related gene in renal fibrosis
Gene Symbol	Description	Category	Gifts	GC Id	Relevance score	GeneCards Link
CFTR	CF Transmembrane Conductance Regulator	Protein Coding	58	GC07P117465	116.14	https://www.genecards.org/cgi-bin/carddisp.pl?gene=CFTR
TGFB1	Transforming Growth Factor Beta 1	Protein Coding	59	GC19M041301	68.07	https://www.genecards.org/cgi-bin/carddisp.pl?gene=TGFB1
REN	Renin	Protein Coding	54	GC01M204123	61.9	https://www.genecards.org/cgi-bin/carddisp.pl?gene=REN
NPHP1	Nephrocystin 1	Protein Coding	50	GC02M110122	60.07	https://www.genecards.org/cgi-bin/carddisp.pl?gene=NPHP1
MUC1	Mucin 1, Cell Surface Associated	Protein Coding	54	GC01M155158	59.61	https://www.genecards.org/cgi-bin/carddisp.pl?gene=MUC1
MET	MET Proto-Oncogene, Receptor Tyrosine Kinase	Protein Coding	62	GC07P116672	57.4	https://www.genecards.org/cgi-bin/carddisp.pl?gene=MET
NPHP4	Nephrocystin 4	Protein Coding	45	GC01M005863	57.17	https://www.genecards.org/cgi-bin/carddisp.pl?gene=NPHP4
ACE	Angiotensin I Converting Enzyme	Protein Coding	56	GC17P063477	57.02	https://www.genecards.org/cgi-bin/carddisp.pl?gene=ACE
NPHP3	Nephrocystin 3	Protein Coding	45	GC03M132683	55.79	https://www.genecards.org/cgi-bin/carddisp.pl?gene=NPHP3
TMEM67	Transmembrane Protein 67	Protein Coding	43	GC08P093754	51.65	https://www.genecards.org/cgi-bin/carddisp.pl?gene=TMEM67
AGT	Angiotensinogen	Protein Coding	56	GC01M230702	51.53	https://www.genecards.org/cgi-bin/carddisp.pl?gene=AGT
HNF1B	HNF1 Homeobox B	Protein Coding	51	GC17M037686	50.31	https://www.genecards.org/cgi-bin/carddisp.pl?gene=HNF1B
CEP290	Centrosomal Protein 290	Protein Coding	46	GC12M088049	49.9	https://www.genecards.org/cgi-bin/carddisp.pl?gene=CEP290
TNF	Tumor Necrosis Factor	Protein Coding	59	GC06P032499	48.58	https://www.genecards.org/cgi-bin/carddisp.pl?gene=TNF
TERT	Telomerase Reverse Transcriptase	Protein Coding	57	GC05M001253	47.49	https://www.genecards.org/cgi-bin/carddisp.pl?gene=TERT
CLCN5	Chloride Voltage-Gated Channel 5	Protein Coding	49	GC0XP049922	47.19	https://www.genecards.org/cgi-bin/carddisp.pl?gene=CLCN5
IFNG	Interferon Gamma	Protein Coding	54	GC12M068064	46.87	https://www.genecards.org/cgi-bin/carddisp.pl?gene=IFNG
PKHD1	PKHD1 Ciliary IPT Domain Containing Fibrocystin/Polyductin	Protein Coding	45	GC06M051588	46.52	https://www.genecards.org/cgi-bin/carddisp.pl?gene=PKHD1
WT1	WT1 Transcription Factor	Protein Coding	54	GC11M032365	46.32	https://www.genecards.org/cgi-bin/carddisp.pl?gene=WT1
IL6	Interleukin 6	Protein Coding	55	GC07P022765	45.26	https://www.genecards.org/cgi-bin/carddisp.pl?gene=IL6
CCN2	Cellular Communication Network Factor 2	Protein Coding	45	GC06M131948	44.81	https://www.genecards.org/cgi-bin/carddisp.pl?gene=CCN2
PKD1	Polycystin 1, Transient Receptor Potential Channel Interacting	Protein Coding	51	GC16M002117	43.88	https://www.genecards.org/cgi-bin/carddisp.pl?gene=PKD1
AGTR1	Angiotensin II Receptor Type 1	Protein Coding	56	GC03P148697	43.19	https://www.genecards.org/cgi-bin/carddisp.pl?gene=AGTR1
INVS	Inversin	Protein Coding	50	GC09P100099	42.73	https://www.genecards.org/cgi-bin/carddisp.pl?gene=INVS
TP53	Tumor Protein P53	Protein Coding	60	GC17M007661	42.31	https://www.genecards.org/cgi-bin/carddisp.pl?gene=TP53
RPGRIP1L	RPGRIP1 Like	Protein Coding	46	GC16M053597	42.03	https://www.genecards.org/cgi-bin/carddisp.pl?gene=RPGRIP1L
UMOD	Uromodulin	Protein Coding	48	GC16M020344	41.47	https://www.genecards.org/cgi-bin/carddisp.pl?gene=UMOD
VEGFA	Vascular Endothelial Growth Factor A	Protein Coding	56	GC06P043770	40.67	https://www.genecards.org/cgi-bin/carddisp.pl?gene=VEGFA
CC2D2A	Coiled-Coil And C2 Domain Containing 2A	Protein Coding	46	GC04P015471	40.52	https://www.genecards.org/cgi-bin/carddisp.pl?gene=CC2D2A
WDR19	WD Repeat Domain 19	Protein Coding	43	GC04P039184	40.09	https://www.genecards.org/cgi-bin/carddisp.pl?gene=WDR19
FN1	Fibronectin 1	Protein Coding	56	GC02M215360	39.71	https://www.genecards.org/cgi-bin/carddisp.pl?gene=FN1
EGF	Epidermal Growth Factor	Protein Coding	57	GC04P109912	39.37	https://www.genecards.org/cgi-bin/carddisp.pl?gene=EGF
KIF21A	Kinesin Family Member 21A	Protein Coding	46	GC12M039293	38.9	https://www.genecards.org/cgi-bin/carddisp.pl?gene=KIF21A
NEK8	NIMA Related Kinase 8	Protein Coding	47	GC17P028725	38.58	https://www.genecards.org/cgi-bin/carddisp.pl?gene=NEK8
IQCB1	IQ Motif Containing B1	Protein Coding	47	GC03M121769	38.01	https://www.genecards.org/cgi-bin/carddisp.pl?gene=IQCB1
IFT140	Intraflagellar Transport 140	Protein Coding	45	GC16M001520	37.6	https://www.genecards.org/cgi-bin/carddisp.pl?gene=IFT140
PAX2	Paired Box 2	Protein Coding	53	GC10P100735	37.54	https://www.genecards.org/cgi-bin/carddisp.pl?gene=PAX2
TSC2	TSC Complex Subunit 2	Protein Coding	56	GC16P002323	37.28	https://www.genecards.org/cgi-bin/carddisp.pl?gene=TSC2
FH	Fumarate Hydratase	Protein Coding	53	GC01M241499	36.99	https://www.genecards.org/cgi-bin/carddisp.pl?gene=FH
TTC21B	Tetratricopeptide Repeat Domain 21B	Protein Coding	43	GC02M165905	36.89	https://www.genecards.org/cgi-bin/carddisp.pl?gene=TTC21B
CTNNB1	Catenin Beta 1	Protein Coding	60	GC03P041236	36.83	https://www.genecards.org/cgi-bin/carddisp.pl?gene=CTNNB1
INS	Insulin	Protein Coding	54	GC11M002159	36.36	https://www.genecards.org/cgi-bin/carddisp.pl?gene=INS
MKS1	MKS Transition Zone Complex Subunit 1	Protein Coding	46	GC17M058205	36.34	https://www.genecards.org/cgi-bin/carddisp.pl?gene=MKS1
VHL	Von Hippel-Lindau Tumor Suppressor	Protein Coding	52	GC03P010189	36.32	https://www.genecards.org/cgi-bin/carddisp.pl?gene=VHL
SDCCAG8	Serologically Defined Colon Cancer Antigen 8	Protein Coding	48	GC01P243255	36.27	https://www.genecards.org/cgi-bin/carddisp.pl?gene=SDCCAG8
SCNN1A	Sodium Channel Epithelial 1 Alpha Subunit	Protein Coding	54	GC12M006326	36.24	https://www.genecards.org/cgi-bin/carddisp.pl?gene=SCNN1A
SLC4A4	Solute Carrier Family 4 Member 4	Protein Coding	52	GC04P071092	35.64	https://www.genecards.org/cgi-bin/carddisp.pl?gene=SLC4A4
SLC4A1	Solute Carrier Family 4 Member 1 (Diego Blood Group)	Protein Coding	54	GC17M044249	35.41	https://www.genecards.org/cgi-bin/carddisp.pl?gene=SLC4A1
EPO	Erythropoietin	Protein Coding	48	GC07P100720	35.12	https://www.genecards.org/cgi-bin/carddisp.pl?gene=EPO
MTOR	Mechanistic Target Of Rapamycin Kinase	Protein Coding	61	GC01M011166	35.07	https://www.genecards.org/cgi-bin/carddisp.pl?gene=MTOR
NPHS1	NPHS1 Adhesion Molecule, Nephrin	Protein Coding	51	GC19M035825	34.94	https://www.genecards.org/cgi-bin/carddisp.pl?gene=NPHS1
ALB	Albumin	Protein Coding	57	GC04P073397	34.8	https://www.genecards.org/cgi-bin/carddisp.pl?gene=ALB
NPHS2	NPHS2 Stomatin Family Member, Podocin	Protein Coding	47	GC01M179519	33.65	https://www.genecards.org/cgi-bin/carddisp.pl?gene=NPHS2
FHIT	Fragile Histidine Triad Diadenosine Triphosphatase	Protein Coding	51	GC03M059712	33.48	https://www.genecards.org/cgi-bin/carddisp.pl?gene=FHIT
PKD2	Polycystin 2, Transient Receptor Potential Cation Channel	Protein Coding	53	GC04P088007	33.15	https://www.genecards.org/cgi-bin/carddisp.pl?gene=PKD2
ATP6V1B1	ATPase H+ Transporting V1 Subunit B1	Protein Coding	49	GC02P070935	33.14	https://www.genecards.org/cgi-bin/carddisp.pl?gene=ATP6V1B1
TSC1	TSC Complex Subunit 1	Protein Coding	54	GC09M132796	32.83	https://www.genecards.org/cgi-bin/carddisp.pl?gene=TSC1
JAG1	Jagged Canonical Notch Ligand 1	Protein Coding	56	GC20M010637	32.81	https://www.genecards.org/cgi-bin/carddisp.pl?gene=JAG1
AQP2	Aquaporin 2	Protein Coding	53	GC12P049950	32.31	https://www.genecards.org/cgi-bin/carddisp.pl?gene=AQP2
AHI1	Abelson Helper Integration Site 1	Protein Coding	49	GC06M135283	32.08	https://www.genecards.org/cgi-bin/carddisp.pl?gene=AHI1
EDN1	Endothelin 1	Protein Coding	53	GC06P012290	32	https://www.genecards.org/cgi-bin/carddisp.pl?gene=EDN1
XPNPEP3	X-Prolyl Aminopeptidase 3	Protein Coding	47	GC22P040857	31.69	https://www.genecards.org/cgi-bin/carddisp.pl?gene=XPNPEP3
HNF1A	HNF1 Homeobox A	Protein Coding	52	GC12P120978	31.51	https://www.genecards.org/cgi-bin/carddisp.pl?gene=HNF1A
PIK3CA	Phosphatidylinositol-4,5-Bisphosphate 3-Kinase Catalytic Subunit Alpha	Protein Coding	59	GC03P179148	31.37	https://www.genecards.org/cgi-bin/carddisp.pl?gene=PIK3CA
FGF23	Fibroblast Growth Factor 23	Protein Coding	51	GC12M004347	31.35	https://www.genecards.org/cgi-bin/carddisp.pl?gene=FGF23
TERC	Telomerase RNA Component	RNA Gene	31	GC03M169765	31.21	https://www.genecards.org/cgi-bin/carddisp.pl?gene=TERC
TRAF3IP1	TRAF3 Interacting Protein 1	Protein Coding	44	GC02P238320	31.16	https://www.genecards.org/cgi-bin/carddisp.pl?gene=TRAF3IP1
BBS1	Bardet-Biedl Syndrome 1	Protein Coding	45	GC11P066499	30.44	https://www.genecards.org/cgi-bin/carddisp.pl?gene=BBS1
TMEM216	Transmembrane Protein 216	Protein Coding	42	GC11P061391	30.37	https://www.genecards.org/cgi-bin/carddisp.pl?gene=TMEM216
INPP5E	Inositol Polyphosphate-5-Phosphatase E	Protein Coding	47	GC09M136428	30.02	https://www.genecards.org/cgi-bin/carddisp.pl?gene=INPP5E
SCNN1G	Sodium Channel Epithelial 1 Gamma Subunit	Protein Coding	52	GC16P023182	29.81	https://www.genecards.org/cgi-bin/carddisp.pl?gene=SCNN1G
BSND	Barttin CLCNK Type Accessory Beta Subunit	Protein Coding	46	GC01P054998	29.29	https://www.genecards.org/cgi-bin/carddisp.pl?gene=BSND
CAV1	Caveolin 1	Protein Coding	54	GC07P116524	29.22	https://www.genecards.org/cgi-bin/carddisp.pl?gene=CAV1
IL10	Interleukin 10	Protein Coding	53	GC01M206767	29.21	https://www.genecards.org/cgi-bin/carddisp.pl?gene=IL10
ELN	Elastin	Protein Coding	50	GC07P074027	29.08	https://www.genecards.org/cgi-bin/carddisp.pl?gene=ELN
SCNN1B	Sodium Channel Epithelial 1 Beta Subunit	Protein Coding	55	GC16P023278	29.02	https://www.genecards.org/cgi-bin/carddisp.pl?gene=SCNN1B
IL1RN	Interleukin 1 Receptor Antagonist	Protein Coding	54	GC02P114223	28.86	https://www.genecards.org/cgi-bin/carddisp.pl?gene=IL1RN
ACTN4	Actinin Alpha 4	Protein Coding	53	GC19P038647	28.84	https://www.genecards.org/cgi-bin/carddisp.pl?gene=ACTN4
CTLA4	Cytotoxic T-Lymphocyte Associated Protein 4	Protein Coding	53	GC02P203867	28.77	https://www.genecards.org/cgi-bin/carddisp.pl?gene=CTLA4
CXCL8	C-X-C Motif Chemokine Ligand 8	Protein Coding	46	GC04P073740	28.5	https://www.genecards.org/cgi-bin/carddisp.pl?gene=CXCL8
RET	Ret Proto-Oncogene	Protein Coding	60	GC10P043040	28.1	https://www.genecards.org/cgi-bin/carddisp.pl?gene=RET
MMP1	Matrix Metallopeptidase 1	Protein Coding	58	GC11M102810	28.01	https://www.genecards.org/cgi-bin/carddisp.pl?gene=MMP1
MMP9	Matrix Metallopeptidase 9	Protein Coding	60	GC20P046008	27.96	https://www.genecards.org/cgi-bin/carddisp.pl?gene=MMP9
HGF	Hepatocyte Growth Factor	Protein Coding	58	GC07M081699	27.93	https://www.genecards.org/cgi-bin/carddisp.pl?gene=HGF
CCL2	C-C Motif Chemokine Ligand 2	Protein Coding	55	GC17P034255	27.83	https://www.genecards.org/cgi-bin/carddisp.pl?gene=CCL2
PDGFRB	Platelet Derived Growth Factor Receptor Beta	Protein Coding	62	GC05M150113	27.66	https://www.genecards.org/cgi-bin/carddisp.pl?gene=PDGFRB
CASR	Calcium Sensing Receptor	Protein Coding	57	GC03P122183	27.42	https://www.genecards.org/cgi-bin/carddisp.pl?gene=CASR
OCRL	OCRL Inositol Polyphosphate-5-Phosphatase	Protein Coding	50	GC0XP129539	27.4	https://www.genecards.org/cgi-bin/carddisp.pl?gene=OCRL
COL1A1	Collagen Type I Alpha 1 Chain	Protein Coding	56	GC17M050183	26.91	https://www.genecards.org/cgi-bin/carddisp.pl?gene=COL1A1
ANKS6	Ankyrin Repeat And Sterile Alpha Motif Domain Containing 6	Protein Coding	45	GC09M098731	26.79	https://www.genecards.org/cgi-bin/carddisp.pl?gene=ANKS6
EGFR	Epidermal Growth Factor Receptor	Protein Coding	62	GC07P055019	26.73	https://www.genecards.org/cgi-bin/carddisp.pl?gene=EGFR
HLA-DRB1	Major Histocompatibility Complex, Class II, DR Beta 1	Protein Coding	52	GC06M032578	26.48	https://www.genecards.org/cgi-bin/carddisp.pl?gene=HLA-DRB1
WDR35	WD Repeat Domain 35	Protein Coding	45	GC02M019867	26.4	https://www.genecards.org/cgi-bin/carddisp.pl?gene=WDR35
IL1B	Interleukin 1 Beta	Protein Coding	54	GC02M112829	26.37	https://www.genecards.org/cgi-bin/carddisp.pl?gene=IL1B
BBS2	Bardet-Biedl Syndrome 2	Protein Coding	47	GC16M056500	26.19	https://www.genecards.org/cgi-bin/carddisp.pl?gene=BBS2
B9D2	B9 Domain Containing 2	Protein Coding	46	GC19M041354	26.18	https://www.genecards.org/cgi-bin/carddisp.pl?gene=B9D2
SLC9A3R1	SLC9A3 Regulator 1	Protein Coding	52	GC17P074749	26.01	https://www.genecards.org/cgi-bin/carddisp.pl?gene=SLC9A3R1
PRTN3	Proteinase 3	Protein Coding	51	GC19P000840	25.93	https://www.genecards.org/cgi-bin/carddisp.pl?gene=PRTN3
IFT80	Intraflagellar Transport 80	Protein Coding	44	GC03M160256	25.9	https://www.genecards.org/cgi-bin/carddisp.pl?gene=IFT80
CRP	C-Reactive Protein	Protein Coding	53	GC01M159682	25.89	https://www.genecards.org/cgi-bin/carddisp.pl?gene=CRP
TLR4	Toll Like Receptor 4	Protein Coding	57	GC09P117704	25.74	https://www.genecards.org/cgi-bin/carddisp.pl?gene=TLR4
IFT172	Intraflagellar Transport 172	Protein Coding	45	GC02M027445	25.7	https://www.genecards.org/cgi-bin/carddisp.pl?gene=IFT172
DYNC2H1	Dynein Cytoplasmic 2 Heavy Chain 1	Protein Coding	45	GC11P103109	25.68	https://www.genecards.org/cgi-bin/carddisp.pl?gene=DYNC2H1
IFT43	Intraflagellar Transport 43	Protein Coding	42	GC14P075902	25.49	https://www.genecards.org/cgi-bin/carddisp.pl?gene=IFT43
CD2AP	CD2 Associated Protein	Protein Coding	50	GC06P047445	25.35	https://www.genecards.org/cgi-bin/carddisp.pl?gene=CD2AP
BBS4	Bardet-Biedl Syndrome 4	Protein Coding	46	GC15P072686	25.18	https://www.genecards.org/cgi-bin/carddisp.pl?gene=BBS4
OFD1	OFD1 Centriole And Centriolar Satellite Protein	Protein Coding	48	GC0XP013752	25.17	https://www.genecards.org/cgi-bin/carddisp.pl?gene=OFD1
SERPINH1	Serpin Family H Member 1	Protein Coding	52	GC11P075562	25.17	https://www.genecards.org/cgi-bin/carddisp.pl?gene=SERPINH1
TNFRSF1A	TNF Receptor Superfamily Member 1A	Protein Coding	56	GC12M006308	25.1	https://www.genecards.org/cgi-bin/carddisp.pl?gene=TNFRSF1A
IL2	Interleukin 2	Protein Coding	52	GC04M122451	25.07	https://www.genecards.org/cgi-bin/carddisp.pl?gene=IL2
IFT122	Intraflagellar Transport 122	Protein Coding	46	GC03P129440	25.07	https://www.genecards.org/cgi-bin/carddisp.pl?gene=IFT122
SPP1	Secreted Phosphoprotein 1	Protein Coding	52	GC04P087975	24.85	https://www.genecards.org/cgi-bin/carddisp.pl?gene=SPP1
CDH1	Cadherin 1	Protein Coding	57	GC16P068737	24.79	https://www.genecards.org/cgi-bin/carddisp.pl?gene=CDH1
GATA3	GATA Binding Protein 3	Protein Coding	56	GC10P008045	24.77	https://www.genecards.org/cgi-bin/carddisp.pl?gene=GATA3
SLC34A1	Solute Carrier Family 34 Member 1	Protein Coding	48	GC05P177380	24.73	https://www.genecards.org/cgi-bin/carddisp.pl?gene=SLC34A1
LRP2	LDL Receptor Related Protein 2	Protein Coding	53	GC02M169127	24.64	https://www.genecards.org/cgi-bin/carddisp.pl?gene=LRP2
TMEM231	Transmembrane Protein 231	Protein Coding	42	GC16M075536	24.59	https://www.genecards.org/cgi-bin/carddisp.pl?gene=TMEM231
FGF2	Fibroblast Growth Factor 2	Protein Coding	54	GC04P122826	24.52	https://www.genecards.org/cgi-bin/carddisp.pl?gene=FGF2
FASLG	Fas Ligand	Protein Coding	54	GC01P172628	24.47	https://www.genecards.org/cgi-bin/carddisp.pl?gene=FASLG
VPS33B	VPS33B Late Endosome And Lysosome Associated	Protein Coding	46	GC15M090998	24.46	https://www.genecards.org/cgi-bin/carddisp.pl?gene=VPS33B
DCDC2	Doublecortin Domain Containing 2	Protein Coding	45	GC06M024122	24.43	https://www.genecards.org/cgi-bin/carddisp.pl?gene=DCDC2
BBS7	Bardet-Biedl Syndrome 7	Protein Coding	43	GC04M121824	24.4	https://www.genecards.org/cgi-bin/carddisp.pl?gene=BBS7
OGG1	8-Oxoguanine DNA Glycosylase	Protein Coding	53	GC03P009751	24.4	https://www.genecards.org/cgi-bin/carddisp.pl?gene=OGG1
GLIS2	GLIS Family Zinc Finger 2	Protein Coding	46	GC16P004365	24.39	https://www.genecards.org/cgi-bin/carddisp.pl?gene=GLIS2
MITF	Melanocyte Inducing Transcription Factor	Protein Coding	53	GC03P069788	24.27	https://www.genecards.org/cgi-bin/carddisp.pl?gene=MITF
SCARB2	Scavenger Receptor Class B Member 2	Protein Coding	50	GC04M076158	24.26	https://www.genecards.org/cgi-bin/carddisp.pl?gene=SCARB2
TIMP1	TIMP Metallopeptidase Inhibitor 1	Protein Coding	51	GC0XP047583	24.14	https://www.genecards.org/cgi-bin/carddisp.pl?gene=TIMP1
BRAF	B-Raf Proto-Oncogene, Serine/Threonine Kinase	Protein Coding	61	GC07M140719	24.11	https://www.genecards.org/cgi-bin/carddisp.pl?gene=BRAF
CEP164	Centrosomal Protein 164	Protein Coding	46	GC11P117314	24.08	https://www.genecards.org/cgi-bin/carddisp.pl?gene=CEP164
B9D1	B9 Domain Containing 1	Protein Coding	42	GC17M019244	24.03	https://www.genecards.org/cgi-bin/carddisp.pl?gene=B9D1
HNF4A	Hepatocyte Nuclear Factor 4 Alpha	Protein Coding	57	GC20P044355	23.91	https://www.genecards.org/cgi-bin/carddisp.pl?gene=HNF4A
CSPP1	Centrosome And Spindle Pole Associated Protein 1	Protein Coding	45	GC08P067055	23.84	https://www.genecards.org/cgi-bin/carddisp.pl?gene=CSPP1
FGFR3	Fibroblast Growth Factor Receptor 3	Protein Coding	62	GC04P001795	23.76	https://www.genecards.org/cgi-bin/carddisp.pl?gene=FGFR3
HRAS	HRas Proto-Oncogene, GTPase	Protein Coding	59	GC11M000522	23.58	https://www.genecards.org/cgi-bin/carddisp.pl?gene=HRAS
TCTN2	Tectonic Family Member 2	Protein Coding	45	GC12P123671	23.54	https://www.genecards.org/cgi-bin/carddisp.pl?gene=TCTN2
INF2	Inverted Formin, FH2 And WH2 Domain Containing	Protein Coding	46	GC14P104690	23.44	https://www.genecards.org/cgi-bin/carddisp.pl?gene=INF2
NPPA	Natriuretic Peptide A	Protein Coding	53	GC01M011909	23.31	https://www.genecards.org/cgi-bin/carddisp.pl?gene=NPPA
KRT7	Keratin 7	Protein Coding	48	GC12P052232	23.3	https://www.genecards.org/cgi-bin/carddisp.pl?gene=KRT7
VIM	Vimentin	Protein Coding	56	GC10P017227	22.87	https://www.genecards.org/cgi-bin/carddisp.pl?gene=VIM
NR3C2	Nuclear Receptor Subfamily 3 Group C Member 2	Protein Coding	54	GC04M148078	22.86	https://www.genecards.org/cgi-bin/carddisp.pl?gene=NR3C2
DSP	Desmoplakin	Protein Coding	56	GC06P007541	22.83	https://www.genecards.org/cgi-bin/carddisp.pl?gene=DSP
CCND1	Cyclin D1	Protein Coding	59	GC11P069641	22.79	https://www.genecards.org/cgi-bin/carddisp.pl?gene=CCND1
BMP6	Bone Morphogenetic Protein 6	Protein Coding	50	GC06P007726	22.79	https://www.genecards.org/cgi-bin/carddisp.pl?gene=BMP6
AGXT	Alanine--Glyoxylate And Serine--Pyruvate Aminotransferase	Protein Coding	52	GC02P240868	22.76	https://www.genecards.org/cgi-bin/carddisp.pl?gene=AGXT
MAPKBP1	Mitogen-Activated Protein Kinase Binding Protein 1	Protein Coding	45	GC15P041775	22.71	https://www.genecards.org/cgi-bin/carddisp.pl?gene=MAPKBP1
NOTCH1	Notch Receptor 1	Protein Coding	59	GC09M136558	22.69	https://www.genecards.org/cgi-bin/carddisp.pl?gene=NOTCH1
CEP55	Centrosomal Protein 55	Protein Coding	46	GC10P093496	22.68	https://www.genecards.org/cgi-bin/carddisp.pl?gene=CEP55
CEP83	Centrosomal Protein 83	Protein Coding	41	GC12M094265	22.6	https://www.genecards.org/cgi-bin/carddisp.pl?gene=CEP83
SHH	Sonic Hedgehog Signaling Molecule	Protein Coding	56	GC07M155799	22.55	https://www.genecards.org/cgi-bin/carddisp.pl?gene=SHH
INSR	Insulin Receptor	Protein Coding	60	GC19M007112	22.37	https://www.genecards.org/cgi-bin/carddisp.pl?gene=INSR
DZIP1L	DAZ Interacting Zinc Finger Protein 1 Like	Protein Coding	42	GC03M138061	22.06	https://www.genecards.org/cgi-bin/carddisp.pl?gene=DZIP1L
IFNA1	Interferon Alpha 1	Protein Coding	45	GC09P021461	22.05	https://www.genecards.org/cgi-bin/carddisp.pl?gene=IFNA1
BBS10	Bardet-Biedl Syndrome 10	Protein Coding	46	GC12M076344	22.04	https://www.genecards.org/cgi-bin/carddisp.pl?gene=BBS10
MKKS	McKusick-Kaufman Syndrome	Protein Coding	45	GC20M010385	21.99	https://www.genecards.org/cgi-bin/carddisp.pl?gene=MKKS
SLC12A1	Solute Carrier Family 12 Member 1	Protein Coding	52	GC15P048191	21.87	https://www.genecards.org/cgi-bin/carddisp.pl?gene=SLC12A1
FBN1	Fibrillin 1	Protein Coding	51	GC15M048408	21.85	https://www.genecards.org/cgi-bin/carddisp.pl?gene=FBN1
FGFR1	Fibroblast Growth Factor Receptor 1	Protein Coding	62	GC08M038400	21.85	https://www.genecards.org/cgi-bin/carddisp.pl?gene=FGFR1
CRB2	Crumbs Cell Polarity Complex Component 2	Protein Coding	45	GC09P123356	21.79	https://www.genecards.org/cgi-bin/carddisp.pl?gene=CRB2
MIR21	MicroRNA 21	RNA Gene	24	GC17P059841	21.76	https://www.genecards.org/cgi-bin/carddisp.pl?gene=MIR21
CD36	CD36 Molecule	Protein Coding	54	GC07P080369	21.57	https://www.genecards.org/cgi-bin/carddisp.pl?gene=CD36
PHEX	Phosphate Regulating Endopeptidase Homolog X-Linked	Protein Coding	47	GC0XP022052	21.55	https://www.genecards.org/cgi-bin/carddisp.pl?gene=PHEX
SFTPC	Surfactant Protein C	Protein Coding	48	GC08P022156	21.55	https://www.genecards.org/cgi-bin/carddisp.pl?gene=SFTPC
KIT	KIT Proto-Oncogene, Receptor Tyrosine Kinase	Protein Coding	59	GC04P054657	21.54	https://www.genecards.org/cgi-bin/carddisp.pl?gene=KIT
ABCA3	ATP Binding Cassette Subfamily A Member 3	Protein Coding	54	GC16M002275	21.45	https://www.genecards.org/cgi-bin/carddisp.pl?gene=ABCA3
ABCB4	ATP Binding Cassette Subfamily B Member 4	Protein Coding	52	GC07M087401	21.39	https://www.genecards.org/cgi-bin/carddisp.pl?gene=ABCB4
ENPP1	Ectonucleotide Pyrophosphatase/Phosphodiesterase 1	Protein Coding	53	GC06P131808	21.31	https://www.genecards.org/cgi-bin/carddisp.pl?gene=ENPP1
RPGRIP1	RPGR Interacting Protein 1	Protein Coding	46	GC14P021288	21.3	https://www.genecards.org/cgi-bin/carddisp.pl?gene=RPGRIP1
NOTCH2	Notch Receptor 2	Protein Coding	56	GC01M119911	21.25	https://www.genecards.org/cgi-bin/carddisp.pl?gene=NOTCH2
PHOX2A	Paired Like Homeobox 2A	Protein Coding	49	GC11M072239	21.2	https://www.genecards.org/cgi-bin/carddisp.pl?gene=PHOX2A
WDPCP	WD Repeat Containing Planar Cell Polarity Effector	Protein Coding	43	GC02M063121	21.13	https://www.genecards.org/cgi-bin/carddisp.pl?gene=WDPCP
KCNJ1	Potassium Voltage-Gated Channel Subfamily J Member 1	Protein Coding	54	GC11M128741	21.07	https://www.genecards.org/cgi-bin/carddisp.pl?gene=KCNJ1
APOE	Apolipoprotein E	Protein Coding	57	GC19P044906	21.06	https://www.genecards.org/cgi-bin/carddisp.pl?gene=APOE
IL4	Interleukin 4	Protein Coding	53	GC05P132673	21.04	https://www.genecards.org/cgi-bin/carddisp.pl?gene=IL4
NRAS	NRAS Proto-Oncogene, GTPase	Protein Coding	57	GC01M114704	21.04	https://www.genecards.org/cgi-bin/carddisp.pl?gene=NRAS
KL	Klotho	Protein Coding	51	GC13P033016	20.98	https://www.genecards.org/cgi-bin/carddisp.pl?gene=KL
SDHB	Succinate Dehydrogenase Complex Iron Sulfur Subunit B	Protein Coding	54	GC01M017020	20.92	https://www.genecards.org/cgi-bin/carddisp.pl?gene=SDHB
SFTPB	Surfactant Protein B	Protein Coding	50	GC02M085657	20.92	https://www.genecards.org/cgi-bin/carddisp.pl?gene=SFTPB
VIPAS39	VPS33B Interacting Protein, Apical-Basolateral Polarity Regulator, Spe-39 Homolog	Protein Coding	43	GC14M077426	20.9	https://www.genecards.org/cgi-bin/carddisp.pl?gene=VIPAS39
TP63	Tumor Protein P63	Protein Coding	53	GC03P189566	20.88	https://www.genecards.org/cgi-bin/carddisp.pl?gene=TP63
ELANE	Elastase, Neutrophil Expressed	Protein Coding	54	GC19P000854	20.84	https://www.genecards.org/cgi-bin/carddisp.pl?gene=ELANE
ERBB2	Erb-B2 Receptor Tyrosine Kinase 2	Protein Coding	62	GC17P039687	20.78	https://www.genecards.org/cgi-bin/carddisp.pl?gene=ERBB2
NEK1	NIMA Related Kinase 1	Protein Coding	49	GC04M169393	20.66	https://www.genecards.org/cgi-bin/carddisp.pl?gene=NEK1
TMEM107	Transmembrane Protein 107	Protein Coding	43	GC17M008639	20.57	https://www.genecards.org/cgi-bin/carddisp.pl?gene=TMEM107
CEP120	Centrosomal Protein 120	Protein Coding	45	GC05M123344	20.56	https://www.genecards.org/cgi-bin/carddisp.pl?gene=CEP120
VPS33A	VPS33A Core Subunit Of CORVET And HOPS Complexes	Protein Coding	46	GC12M122229	20.54	https://www.genecards.org/cgi-bin/carddisp.pl?gene=VPS33A
SMAD3	SMAD Family Member 3	Protein Coding	55	GC15P067063	20.53	https://www.genecards.org/cgi-bin/carddisp.pl?gene=SMAD3
FAS	Fas Cell Surface Death Receptor	Protein Coding	56	GC10P088969	20.51	https://www.genecards.org/cgi-bin/carddisp.pl?gene=FAS
B2M	Beta-2-Microglobulin	Protein Coding	56	GC15P044711	20.5	https://www.genecards.org/cgi-bin/carddisp.pl?gene=B2M
ENG	Endoglin	Protein Coding	53	GC09M127815	20.44	https://www.genecards.org/cgi-bin/carddisp.pl?gene=ENG
TCTN3	Tectonic Family Member 3	Protein Coding	46	GC10M095663	20.3	https://www.genecards.org/cgi-bin/carddisp.pl?gene=TCTN3
HPS1	HPS1 Biogenesis Of Lysosomal Organelles Complex 3 Subunit 1	Protein Coding	47	GC10M098416	20.27	https://www.genecards.org/cgi-bin/carddisp.pl?gene=HPS1
CLCNKB	Chloride Voltage-Gated Channel Kb	Protein Coding	50	GC01P016043	20.24	https://www.genecards.org/cgi-bin/carddisp.pl?gene=CLCNKB
HPRT1	Hypoxanthine Phosphoribosyltransferase 1	Protein Coding	53	GC0XP134460	20.23	https://www.genecards.org/cgi-bin/carddisp.pl?gene=HPRT1
NLRP3	NLR Family Pyrin Domain Containing 3	Protein Coding	53	GC01P247415	20.21	https://www.genecards.org/cgi-bin/carddisp.pl?gene=NLRP3
ITGA3	Integrin Subunit Alpha 3	Protein Coding	53	GC17P050055	20.15	https://www.genecards.org/cgi-bin/carddisp.pl?gene=ITGA3
CLCNKA	Chloride Voltage-Gated Channel Ka	Protein Coding	46	GC01P016018	20.13	https://www.genecards.org/cgi-bin/carddisp.pl?gene=CLCNKA
PTEN	Phosphatase And Tensin Homolog	Protein Coding	59	GC10P087863	20.11	https://www.genecards.org/cgi-bin/carddisp.pl?gene=PTEN

## Sheet: Table S4
Table S4 All potential targets of AMC against renal fibrosis
Gene Symbol	Protein name	Uniprot
MET	Hepatocyte growth factor receptor	P08581
ACE	Angiotensin-converting enzyme 2	Q9BYF1
TNF	Tumor necrosis factor	P01375
TERT	Telomerase reverse transcriptase	O14746
IL6	Interleukin-6 receptor subunit alpha	P08887
VEGFA	Vascular endothelial growth factor A	P15692
PIK3CA	Phosphatidylinositol 4,5-bisphosphate 3-kinase catalytic subunit alpha isoform	P42336
MMP1	Interstitial collagenase	P03956
MMP9	Matrix metalloproteinase-9	P14780
EGFR	Epidermal growth factor receptor	P00533
TLR4	Toll-like receptor 4	O00206
IL2	Interleukin-2 receptor subunit beta	P14784
FGF2	Fibroblast growth factor 2	P09038
HNF4A	Hepatocyte nuclear factor 4-alpha	P41235
NR3C2	Mineralocorticoid receptor	P08235
INSR	Insulin receptor	P06213
ELANE	Neutrophil elastase	P08246

## Sheet: Table S5
Table S5 Gene Ontology (GO) Biological Process analysis of AMC treating renal fibrosis (p < 0.01)
Category	Term	Description	PValue	Genes
GOTERM_BP_DIRECT	GO:0045429	positive regulation of nitric oxide biosynthetic process	1.40467e-07	EGFR, IL6, TNF, TLR4, INSR
GOTERM_BP_DIRECT	GO:0043406	positive regulation of MAP kinase activity	5.12134e-07	EGFR, TNF, VEGFA, ELANE, FGF2
GOTERM_BP_DIRECT	GO:0048661	positive regulation of smooth muscle cell proliferation	5.48322e-07	EGFR, IL6, TNF, ELANE, FGF2
GOTERM_BP_DIRECT	GO:0070374	positive regulation of ERK1 and ERK2 cascade	1.19935e-06	EGFR, IL6, TNF, VEGFA, TLR4, FGF2
GOTERM_BP_DIRECT	GO:0051897	positive regulation of protein kinase B signaling	2.13267e-06	EGFR, IL6, TNF, FGF2, INSR
GOTERM_BP_DIRECT	GO:0045944	positive regulation of transcription from RNA polymerase II promoter	5.58908e-06	EGFR, IL6, TNF, HNF4A, VEGFA, MET, TLR4, FGF2, IL2
GOTERM_BP_DIRECT	GO:0008284	positive regulation of cell proliferation	8.82495e-06	EGFR, AVPR2, IL6, VEGFA, FGF2, INSR, IL2
GOTERM_BP_DIRECT	GO:0001934	positive regulation of protein phosphorylation	1.10763e-05	EGFR, TNF, MMP9, VEGFA, INSR
GOTERM_BP_DIRECT	GO:0045416	positive regulation of interleukin-8 biosynthetic process	3.38256e-05	TNF, ELANE, TLR4
GOTERM_BP_DIRECT	GO:0033138	positive regulation of peptidyl-serine phosphorylation	6.40834e-05	IL6, TNF, VEGFA, PIK3CA
GOTERM_BP_DIRECT	GO:0032722	positive regulation of chemokine production	0.000163301	IL6, TNF, TLR4
GOTERM_BP_DIRECT	GO:0010628	positive regulation of gene expression	0.000186649	AVPR2, IL6, TNF, VEGFA, TLR4
GOTERM_BP_DIRECT	GO:0000187	activation of MAPK activity	0.000226297	TNF, TLR4, FGF2, INSR
GOTERM_BP_DIRECT	GO:0031334	positive regulation of protein complex assembly	0.000276437	TNF, VEGFA, FGF2
GOTERM_BP_DIRECT	GO:0018108	peptidyl-tyrosine phosphorylation	0.000645699	EGFR, MET, FGF2, INSR
GOTERM_BP_DIRECT	GO:0050918	positive chemotaxis	0.000705819	VEGFA, MET, FGF2
GOTERM_BP_DIRECT	GO:0045740	positive regulation of DNA replication	0.00101655	EGFR, IL6, INSR
GOTERM_BP_DIRECT	GO:0032147	activation of protein kinase activity	0.0011665	VEGFA, PIK3CA, INSR
GOTERM_BP_DIRECT	GO:0032755	positive regulation of interleukin-6 production	0.0011665	IL6, TNF, TLR4
GOTERM_BP_DIRECT	GO:0032729	positive regulation of interferon-gamma production	0.0012187	TNF, TLR4, IL2
GOTERM_BP_DIRECT	GO:0043066	negative regulation of apoptotic process	0.00149207	EGFR, IL6, MMP9, VEGFA, IL2
GOTERM_BP_DIRECT	GO:0007249	I-kappaB kinase/NF-kappaB signaling	0.00206458	AVPR2, TNF, TLR4
GOTERM_BP_DIRECT	GO:0050679	positive regulation of epithelial cell proliferation	0.00206458	EGFR, IL6, VEGFA
GOTERM_BP_DIRECT	GO:0045893	positive regulation of transcription, DNA-templated	0.00234882	IL6, TNF, HNF4A, FGF2, INSR
GOTERM_BP_DIRECT	GO:0000165	MAPK cascade	0.0030241	EGFR, TNF, FGF2, IL2
GOTERM_BP_DIRECT	GO:0050729	positive regulation of inflammatory response	0.00303865	EGFR, TLR4, IL2
GOTERM_BP_DIRECT	GO:0030324	lung development	0.00328869	EGFR, VEGFA, FGF2
GOTERM_BP_DIRECT	GO:0022617	extracellular matrix disassembly	0.00328869	MMP9, ELANE, MMP1
GOTERM_BP_DIRECT	GO:0045079	negative regulation of chemokine biosynthetic process	0.00339084	IL6, ELANE
GOTERM_BP_DIRECT	GO:0014066	regulation of phosphatidylinositol 3-kinase signaling	0.00346058	EGFR, PIK3CA, FGF2
GOTERM_BP_DIRECT	GO:0042060	wound healing	0.00363661	EGFR, IL6, FGF2
GOTERM_BP_DIRECT	GO:1900086	positive regulation of peptidyl-tyrosine autophosphorylation	0.00451869	ACE, VEGFA
GOTERM_BP_DIRECT	GO:0046854	phosphatidylinositol phosphorylation	0.00498309	EGFR, PIK3CA, FGF2
GOTERM_BP_DIRECT	GO:0007169	transmembrane receptor protein tyrosine kinase signaling pathway	0.00519157	EGFR, MET, INSR
GOTERM_BP_DIRECT	GO:0042593	glucose homeostasis	0.00573013	IL6, HNF4A, INSR
GOTERM_BP_DIRECT	GO:0048015	phosphatidylinositol-mediated signaling	0.0062933	EGFR, PIK3CA, FGF2
GOTERM_BP_DIRECT	GO:0060664	epithelial cell proliferation involved in salivary gland morphogenesis	0.00677078	IL6, TNF
GOTERM_BP_DIRECT	GO:0071222	cellular response to lipopolysaccharide	0.00712255	IL6, TNF, TLR4
GOTERM_BP_DIRECT	GO:0045766	positive regulation of angiogenesis	0.00736814	VEGFA, FGF2, TERT
GOTERM_BP_DIRECT	GO:0032609	interferon-gamma production	0.00789501	AVPR2, TLR4
GOTERM_BP_DIRECT	GO:0050900	leukocyte migration	0.00825767	MMP9, PIK3CA, MMP1
GOTERM_BP_DIRECT	GO:0010888	negative regulation of lipid storage	0.00901804	IL6, TNF
GOTERM_BP_DIRECT	GO:0051092	positive regulation of NF-kappaB transcription factor activity	0.0097483	IL6, TNF, TLR4

## Sheet: Table S6
Table S6 Gene Ontology (GO) Cellular Component analysis of AMC treating renal fibrosis (p < 0.01)
Category	Term	Description	PValue	Genes
GOTERM_CC_DIRECT	GO:0005576	Extracellular region	1.23576e-06	TTR, ACE, IL6, TNF, MMP9, VEGFA, ELANE, MET, FGF2, MMP1, IL2
GOTERM_CC_DIRECT	GO:0005615	Extracellular space	3.00065e-06	EGFR, TTR, ACE, IL6, TNF, MMP9, VEGFA, ELANE, FGF2, IL2
GOTERM_CC_DIRECT	GO:0009986	Cell surface	0.000187916	EGFR, TNF, VEGFA, ELANE, MET, TLR4
GOTERM_CC_DIRECT	GO:0009897	External side of plasma membrane	0.00132857	ACE, IL6, TNF, TLR4
GOTERM_CC_DIRECT	GO:0043235	Receptor complex	0.00762449	EGFR, NR3C2, INSR

## Sheet: Table S7
Table S7 Gene Ontology (GO) Molecular Function analysis of AMC treating renal fibrosis (p < 0.01)
Category	Term	Description	PValue	Genes
GOTERM_MF_DIRECT	GO:0004175	endopeptidase activity	2.89152e-05	ACE, MMP9, ELANE, MMP1
GOTERM_MF_DIRECT	GO:0005125	cytokine activity	3.91627e-05	IL6, TNF, VEGFA, FGF2, IL2
GOTERM_MF_DIRECT	GO:0004713	protein tyrosine kinase activity	0.000422425	EGFR, MET, FGF2, INSR
GOTERM_MF_DIRECT	GO:0008083	growth factor activity	0.000750857	IL6, VEGFA, FGF2, IL2
GOTERM_MF_DIRECT	GO:0004714	transmembrane receptor protein tyrosine kinase activity	0.000823601	EGFR, MET, INSR
GOTERM_MF_DIRECT	GO:0046934	phosphatidylinositol-4,5-bisphosphate 3-kinase activity	0.00218005	EGFR, PIK3CA, FGF2
GOTERM_MF_DIRECT	GO:0005088	Ras guanyl-nucleotide exchange factor activity	0.00729358	EGFR, FGF2, IL2
GOTERM_MF_DIRECT	GO:0042802	identical protein binding	0.00874438	EGFR, TTR, TNF, MMP9, VEGFA

## Sheet: Table S8
Table S8 Kyoto Encyclopedia of Genes and Genomes (KEGG) Pathway analysis (p < 0.05)
Category	Term	Count	PValue	Genes
KEGG_PATHWAY	hsa05205:Proteoglycans in cancer	8	2.40275e-07	EGFR, TNF, MMP9, VEGFA, MET, PIK3CA, TLR4, FGF2
KEGG_PATHWAY	hsa04151:PI3K-Akt signaling pathway	9	6.03236e-07	EGFR, IL6, VEGFA, MET, PIK3CA, TLR4, FGF2, INSR, IL2
KEGG_PATHWAY	hsa04066:HIF-1 signaling pathway	6	2.58344e-06	EGFR, IL6, VEGFA, PIK3CA, TLR4, INSR
KEGG_PATHWAY	hsa05142:Chagas disease (American trypanosomiasis)	6	3.84149e-06	ACE, IL6, TNF, PIK3CA, TLR4, IL2
KEGG_PATHWAY	hsa05200:Pathways in cancer	8	2.2222e-05	EGFR, IL6, MMP9, VEGFA, MET, PIK3CA, FGF2, MMP1
KEGG_PATHWAY	hsa05323:Rheumatoid arthritis	5	5.24102e-05	IL6, TNF, VEGFA, TLR4, MMP1
KEGG_PATHWAY	hsa04015:Rap1 signaling pathway	6	0.000115909	EGFR, VEGFA, MET, PIK3CA, FGF2, INSR
KEGG_PATHWAY	hsa05219:Bladder cancer	4	0.000126126	EGFR, MMP9, VEGFA, MMP1
KEGG_PATHWAY	hsa04014:Ras signaling pathway	6	0.000163967	EGFR, VEGFA, MET, PIK3CA, FGF2, INSR
KEGG_PATHWAY	hsa05144:Malaria	4	0.000215337	IL6, TNF, MET, TLR4
KEGG_PATHWAY	hsa05161:Hepatitis B	5	0.000364032	IL6, TNF, MMP9, PIK3CA, TLR4
KEGG_PATHWAY	hsa05321:Inflammatory bowel disease (IBD)	4	0.000475919	IL6, TNF, TLR4, IL2
KEGG_PATHWAY	hsa05218:Melanoma	4	0.000645917	EGFR, MET, PIK3CA, FGF2
KEGG_PATHWAY	hsa05146:Amoebiasis	4	0.00206656	IL6, TNF, PIK3CA, TLR4
KEGG_PATHWAY	hsa04620:Toll-like receptor signaling pathway	4	0.00206656	IL6, TNF, PIK3CA, TLR4
KEGG_PATHWAY	hsa04668:TNF signaling pathway	4	0.00212292	IL6, TNF, MMP9, PIK3CA
KEGG_PATHWAY	hsa04931:Insulin resistance	4	0.00218024	IL6, TNF, PIK3CA, INSR
KEGG_PATHWAY	hsa05332:Graft-versus-host disease	3	0.00290166	IL6, TNF, IL2
KEGG_PATHWAY	hsa05166:HTLV-I infection	5	0.00295381	IL6, TNF, PIK3CA, TERT, IL2
KEGG_PATHWAY	hsa05162:Measles	4	0.00393981	IL6, PIK3CA, TLR4, IL2
KEGG_PATHWAY	hsa04068:FoxO signaling pathway	4	0.00402387	EGFR, IL6, PIK3CA, INSR
KEGG_PATHWAY	hsa04960:Aldosterone-regulated sodium reabsorption	3	0.0040369	NR3C2, PIK3CA, INSR
KEGG_PATHWAY	hsa04932:Non-alcoholic fatty liver disease (NAFLD)	4	0.00562432	IL6, TNF, PIK3CA, INSR
KEGG_PATHWAY	hsa04930:Type II diabetes mellitus	3	0.00606553	TNF, PIK3CA, INSR
KEGG_PATHWAY	hsa05202:Transcriptional misregulation in cancer	4	0.00743858	IL6, MMP9, ELANE, MET
KEGG_PATHWAY	hsa05134:Legionellosis	3	0.00762819	IL6, TNF, TLR4
KEGG_PATHWAY	hsa05164:Influenza A	4	0.00833015	IL6, TNF, PIK3CA, TLR4
KEGG_PATHWAY	hsa05230:Central carbon metabolism in cancer	3	0.010592	EGFR, MET, PIK3CA
KEGG_PATHWAY	hsa05212:Pancreatic cancer	3	0.0109125	EGFR, VEGFA, PIK3CA
KEGG_PATHWAY	hsa05211:Renal cell carcinoma	3	0.0112372	VEGFA, MET, PIK3CA
KEGG_PATHWAY	hsa04520:Adherens junction	3	0.0129245	EGFR, MET, INSR
KEGG_PATHWAY	hsa04510:Focal adhesion	4	0.0131981	EGFR, VEGFA, MET, PIK3CA
KEGG_PATHWAY	hsa05133:Pertussis	3	0.0143495	IL6, TNF, TLR4
KEGG_PATHWAY	hsa05410:Hypertrophic cardiomyopathy (HCM)	3	0.0154612	ACE, IL6, TNF
KEGG_PATHWAY	hsa04915:Estrogen signaling pathway	3	0.0242291	EGFR, MMP9, PIK3CA
KEGG_PATHWAY	hsa04660:T cell receptor signaling pathway	3	0.0246879	TNF, PIK3CA, IL2
KEGG_PATHWAY	hsa05206:MicroRNAs in cancer	4	0.0313776	EGFR, MMP9, VEGFA, MET
KEGG_PATHWAY	hsa04152:AMPK signaling pathway	3	0.0361997	HNF4A, PIK3CA, INSR
KEGG_PATHWAY	hsa05160:Hepatitis C	3	0.0417455	EGFR, TNF, PIK3CA
KEGG_PATHWAY	hsa04630:Jak-STAT signaling pathway	3	0.0487995	IL6, PIK3CA, IL2

## Sheet: Table S9
Table S9 The number of targets, reference, network based efficacy (NE) and contribution indexes (CI) of potential active components in AMC
No.	Molecule Name	No. targets	No. reference	NE	CI
AMC1	caffeic acid	56	5	71	17.4276
AMC2	quercetin	100	19	48	44.7717
AMC3	stigmasterol	45	0	0	0
AMC4	α-spinasterol	59	0	0	0
AMC5	9,12-octadecadienoic acid	100	13	26	16.593
AMC6	β-sitosterol	46	0	0	0
AMC7	myricetin	100	3	48	7.06922
AMC8	quercetin-7-O-β-D-glucopyranoside	30	0	31	0
AMC9	quercetin-3-O-robinobioside	21	0	29	0
AMC10	hyperoside	22	2	29	2.84732
AMC11	isoquercitrin	22	2	29	2.84732
AMC12	gossypetin-8-O-β-D-glucuropyranoside	20	1	28	1.37457
AMC13	quercetin- 3′-O-β-D-glucoside	23	1	28	1.37457
AMC14	rutin	21	4	29	5.69465
